# Supplementary material for: Physicochemical Parameters Affecting the Distribution and Diversity of the Water Column Microbial Community in the High-Altitude Andean Lake System of La Brava and La Punta
Source: MDPI journal article supplement (doi:10.3390/microorganisms8081181), 2020-08-03
Supplement: s1 [file s1]

# Supplemental Data

## Genera in La Brava and La Punta lakes

### Phylum: Proteobacteria - Class: Gammaproteobacteria

*Methylophaga* comprise halophilic methylotrophic bacteria, which are normally isolated from marine environments or environments with low water activity, such as hypersaline lakes. These bacteria play a key role in the biogeochemical cycles of methanol, mono-methylamine, dimethylsulfide, and methyl bromide.

*Pseudoalteromonas* are gram-negative bacteria that have flagella. This genus contains numerous marine species, which synthesize biologically active molecules. These bacteria are usually found in association with marine eukaryotes, and have antibacterial, bacteriolytic, agrolitic, and algacidal activity. Their antibacterial activity allows them to colonize surfaces. The production of bacteriolytic substances, such as agaroses and toxins, allows them to compete for nutrients and space, as well as to protect themselves from possible predators. The bacteria have a great competitive advantage in the acquisition of nutrients and colonization, due to their lethal activity against phytoplankton. This provides ecological relief, since it controls the succession of phytoplankton in marine environments. The bacteria live in a wide variety of habitats globally, suggesting great adaptability and successful survival strategies.

*Pseudomonas* are gram negative bacteria that are motile with a flagellum. There are approximately 200 species. Their metabolic diversity allows them to colonize a wide range of niches. For example: *Pseudomonas aeruginosa* is an opportunistic pathogen, *P. syringae* is a plant pathogen, and *P. putida* is an efficient inhabitant of soils. Many members of this genus can adapt to natural environments, such as soil.

*Pseudospirillum* is a gram-negative bacteria genus. The bacteria are mobile by means of a flagellum, form spores, are halophilic, aerobic, chemoheterotrophic, oxidase positive, and catalase negative.

*Thiomicrospira* are moderately psychrophilic, aerobic, autologous chemolytic, and can oxidize sulfur and hydrogen. This latter activity is related to the concentration of nickel in the medium. This bacterium has been detected in several environments, including hydrothermal vents at the sea floor. This bacterial genus fixes carbon in hydrothermal vents, coastal sediments, hypersaline lakes and other sulfidic environments, and has a surprising diversity of mechanisms for dissolving inorganic carbon.

### Phylum: Proteobacteria. Class: Alphaproteobacteria

*Roseovarius*. This genus is a member of the *Rhodobacteraceae* family. By 2014, 18 species had been recognized. Members of this genus have been isolated from several marine habitats, such as seawater hypersaline, marine sediments, and even algal cells. Tolerance and adaptation to extreme environments make them potential candidates for biotechnological purposes.

*Ruegeria* is genus of bacteria that are gram negative, aerobic, with oxidase and catalase activity. They are not photosynthetic and require NaCl for growth. The genus is composed of several species, which includes *R. atlantica*, *R. lacuscaerulensis*, and *R. pomeroyi*. These three species have been isolated from salty environments. *R. mobilis* has been isolated from the surface of the ocean water of the most diverse climatic zones, except in the waters of the Arctic and Antarctic.

### Phylum: Bacteroidetes. Class: Flavobacteria

*Psychroflexus* belongs to the *Flavobacteriaceae* family. It is a group of psychrophilic bacteria that synthesize polyunsaturated fatty acids, such as eicosapentaenoic acid (20: 5, Omega 3) and arachidonic acid (20: 4, Omega 6). They have been found in closely related groups to moderate halophiles, with 98% sequence similarity. They also display 95.4% sequence similarity with *Psychroflexus halocasei*. In 2014, Chun described *Psychroflex salarius* sp., a bacterium that was isolated

at the Gomo salina in Korea. The bacterium is gram negative, moderately halophilic, with an optimal pH and temperatures of 25 and 6.5°C, respectively. It also has catalase and oxidase activity, and produces carotenoid pigment.

*Balneola* is a genus of bacteria that are aerobic, gram negative, and capable of living in a wide temperature range (10-40°C). The optimum pH is 8.0 and the salinity range is 0-50 g/L. They are capable of growing and living in extreme environments. These bacteria have been isolated from surface waters of the Mediterranean Sea. They require oxygen to oxidize substrate and generate energy. They are able to use N-acetylgalactosamine, adonitol, arabitrol, arabinose, fructose, fucose, lactulose, maltose, and sorbitol as energy sources.

**Phylum: Actinobacteria - Class: Actinobacteria**

*Candidatus\_Aquiluna*. It was once believed that this only grew in fresh water. However, it has also been isolated from saline environments. It is part of the *Microbacteriaceae* family.

*DS001* is a genus of the *Microbacteriaceae* family. It has been isolated from marine environments and also from hypersaline lakes located in deserts.

**Phylum: Verrucomicrobia. Class: Verrucomicrobiae**

*Rubritalea* is an obligate marine bacterium that is gram negative, round, and non-mobile. It has an aerobic and chemoorganotrophic metabolism. *R. marina* is able to grow using glucose, xylose, melibiose, or cellobiose as the sole source of energy in aerobic conditions. It cannot grow anaerobically.

**Table S1.** Comparison between lakes and physicochemical parameters of the water column samples obtained from the La Brava–La Punta lake system during the summer (December 2017).

| Variable                                       | La Brava - La Punta |          | La Brava<br>(main - isolated) |          | La Punta<br>(main - isolated) |         | Main<br>La Brava - La Punta |         | Isolated<br>La Brava - La Punta |         |
|------------------------------------------------|---------------------|----------|-------------------------------|----------|-------------------------------|---------|-----------------------------|---------|---------------------------------|---------|
|                                                | H                   | p-value  | H                             | p-value  | H                             | p-value | H                           | p-value | H                               | p-value |
| pH                                             | 9.22                | 0.0009*  | 2.55                          | 0.1417   | 3.43                          | 0.1333  | 7.00                        | 0.0061* | 0.33                            | 0.8000  |
| Dissolved Oxygen (mg/L)                        | 0.95                | 0.3676   | 5.73                          | 0.0167*  | 3.43                          | 0.1333  | 6.04                        | 0.0121* | 3.00                            | 0.2000  |
| Salinity (g/L)                                 | 2.65                | 0.1179   | 2.55                          | 0.1333   | 3.43                          | 0.1333  | 5.14                        | 0.0242* | 0.33                            | 0.8000  |
| EC (mS/cm)                                     | 1.99                | 0.1806   | 2.92                          | 0.1167   | 3.43                          | 0.1333  | 5.14                        | 0.0242* | 3.00                            | 0.8000  |
| Total Silica (mg/L)                            | 10.59               | 0.0002*  | 0.12                          | 0.8333   | 0.86                          | 0.5333  | 7.00                        | 0.0061* | 3.00                            | 0.2000  |
| Ammonium (mg/L)                                | -                   | -        | -                             | -        | -                             | -       | -                           | -       | -                               | -       |
| Nitrite (mg/L)                                 | -                   | -        | -                             | -        | -                             | -       | -                           | -       | -                               | -       |
| Nitrate (mg/L)                                 | 0.36                | 0.5794   | 2.92                          | 0.1083   | 3.43                          | 0.1333  | 2.89                        | 0.1030  | 3.00                            | 0.2000  |
| Total Nitrogen (mg/L)                          | 0.00                | > 0.9990 | 0.00                          | > 0.9999 | 3.43                          | 0.1333  | 2.29                        | 0.1364  | 3.00                            | 0.2000  |
| P-PO <sub>4</sub> Phosphates (mg/L)            | 0.42                | 0.5000   | 0.47                          | 0.5333   | -                             | -       | 0.57                        | 0.4909  | -                               | -       |
| Phosphorus (mg/L)                              | 0.50                | 0.4895   | 0.47                          | 0.5500   | 0.86                          | 0.4667  | 0.08                        | 0.7879  | 1.33                            | 0.4000  |
| DISS Calcium (mg/L)                            | 0.20                | 0.6354   | 2.19                          | 0.1833   | 1.93                          | 0.5333  | 2.89                        | 0.1091  | 1.33                            | 0.4000  |
| DISS Magnesium (mg/L)                          | 3.40                | 0.0643   | 3.75                          | 0.0667   | 3.43                          | 0.1333  | 5.14                        | 0.0242* | 1.33                            | 0.4000  |
| Hardness (mg/L)                                | 3.40                | 0.0643   | 3.75                          | 0.0667   | 3.43                          | 0.1333  | 5.14                        | 0.0242* | 1.33                            | 0.4000  |
| Alkalinity carbonates mg/L CaCO <sub>3</sub>   | 1.69                | 0.1384   | 2.55                          | 0.0667   | 3.43                          | 0.1333  | 7.00                        | 0.0030* | 1.33                            | 0.4000  |
| Alkalinity bicarbonates mg/L CaCO <sub>3</sub> | 3.60                | 0.5990   | 2.92                          | 0.1083   | 3.43                          | 0.1333  | 5.58                        | 0.1520  | 3.00                            | 0.2000  |
| Total Alkalinity mg/L CaCO <sub>3</sub>        | 2.65                | 0.1130   | 1.57                          | 0.2500   | 3.43                          | 0.1333  | 3.57                        | 0.0697  | 3.00                            | 0.2000  |
| TOC (mg/L)                                     | 0.14                | 0.7319   | 2.55                          | 0.1250   | 1.93                          | 0.5333  | 0.89                        | 0.4121  | 3.00                            | 0.2000  |
| Totals Solids (mg/L)                           | 0.42                | 0.5260   | 0.21                          | 0.6917   | 0.86                          | 0.5333  | 0.14                        | 0.6606  | 3.00                            | 0.1000  |

La Brava: La Brava medians, La Punta: La Punta medians, H: H-statistic for Kruskal-Wallis, DISS: Dissolved, EC: electrical conductivity, TOC: total organic carbon. (\*) Represents statistical significance (p-value < 0.05). (-) denotes comparisons not made to show no variation.

**Table S2.** Raw data summary generated by MiSeq using demultiplexing data for sampling.

| Lake     | Sampling points | Length | Number of Raw Reads | Numbers of Bases | Q20(%) | Q30(%) | Pair-end after filtering | No Chimera after filtering | CG (%) |
|----------|-----------------|--------|---------------------|------------------|--------|--------|--------------------------|----------------------------|--------|
| La Brava | B01             | 250    | 2,030,906           | 507,726,500      | 97.58  | 95.56  | 1,015,453                | 805,032                    | 51.94  |
|          | B02             | 250    | 1,729,514           | 432,378,500      | 97.76  | 95.87  | 864,757                  | 709,508                    | 49.97  |
|          | B03             | 250    | 1,699,904           | 424,976,000      | 97.18  | 94.88  | 779,914                  | 619,301                    | 50.80  |
|          | B04             | 250    | 2,172,562           | 543,140,500      | 96.34  | 93.51  | 1,086,281                | 915,064                    | 50.62  |
|          | B05             | 250    | 1,518,976           | 379,744,000      | 97.44  | 95.33  | 759,488                  | 599,288                    | 50.92  |
|          | B06             | 250    | 1,699,904           | 424,976,000      | 97.18  | 94.88  | 849,952                  | 665,214                    | 51.04  |
|          | B07             | 250    | 1,832,122           | 458,030,500      | 97.66  | 95.70  | 916,061                  | 726,066                    | 51.03  |
|          | B08             | 250    | 1,732,300           | 433,075,000      | 97.70  | 95.77  | 866,15                   | 720,918                    | 52.32  |
|          | B09             | 250    | 2,179,438           | 544,859,500      | 97.06  | 94.71  | 1,089,719                | 768,862                    | 51.85  |
|          | B10             | 250    | 1,720,590           | 430,147,500      | 97.40  | 95.28  | 860,295                  | 717,529                    | 51.84  |
| La Punta | P01             | 250    | 1,413,826           | 353,456,500      | 97.06  | 94.69  | 706,913                  | 393,33                     | 53.50  |
|          | P02             | 250    | 1,445,924           | 361,481,000      | 97.51  | 95.43  | 722,962                  | 526,899                    | 54.29  |
|          | P03             | 250    | 1,199,502           | 299,875,500      | 96.79  | 94.22  | 599,751                  | 504,548                    | 53.84  |
|          | P04             | 250    | 1,807,074           | 451,768,500      | 97.28  | 95.05  | 903,537                  | 790,82                     | 53.27  |
|          | P05             | 250    | 2,175,272           | 543,818,000      | 97.69  | 95.74  | 1,087,636                | 789,538                    | 52.83  |
|          | P06             | 250    | 1,224,784           | 306,196,000      | 97.35  | 95.13  | 612,392                  | 501,251                    | 54.10  |

**Table S3.** Influence of environmental physicochemical parameters on the  $\alpha$ -diversity of the La Brava-La Punta lake.

| Factor      | Shannon index |         |          |         |                     |         |                         |         |          |         |                     |         |                         |         |
|-------------|---------------|---------|----------|---------|---------------------|---------|-------------------------|---------|----------|---------|---------------------|---------|-------------------------|---------|
|             | Lakes system  |         | La Brava |         | La Brava Main Water |         | La Brava Isolated Water |         | La Punta |         | La Punta Main Water |         | La Punta Isolated Water |         |
|             | Pearson       | p-value | Pearson  | p-value | Pearson             | p-value | Pearson                 | p-value | Pearson  | p-value | Pearson             | p-value | Pearson                 | p-value |
| pH          | 0.77          | 0.0004* | 0.75     | 0.0116* | 0.67                | 0.0975  | 0.96                    | 0.1885  | 0.61     | 0.2022  | 0.16                | 0.8423  | -                       | -       |
| EC          | -0.55         | 0.0288* | -0.44    | 0.1990  | -0.61               | 0.1438  | -0.85                   | 0.3573  | -0.53    | 0.2800  | 0.14                | 0.8663  | -                       | -       |
| Salinity    | -0.68         | 0.0034* | -0.62    | 0.0558  | -0.61               | 0.1498  | -0.97                   | 0.1670  | -0.56    | 0.2756  | 0.13                | 0.8636  | -                       | -       |
| Ox diss     | 0.30          | 0.2534  | 0.25     | 0.4817  | 0.16                | 0.7323  | 0.98                    | 0.1208  | 0.70     | 0.1212  | 0.32                | 0.6840  | -                       | -       |
| Ca diss     | -0.37         | 0.1613  | -0.23    | 0.5215  | -0.24               | 0.6021  | -0.81                   | 0.3940  | -0.27    | 0.6110  | -0.01               | 0.9930  | -                       | -       |
| Mg diss     | -0.39         | 0.1374  | -0.22    | 0.5357  | -0.22               | 0.6298  | -0.95                   | 0.2110  | -0.32    | 0.5399  | 0.04                | 0.9588  | -                       | -       |
| Carbonate   | 0.51          | 0.0414* | 0.54     | 0.1090  | 0.00                | >0.9990 | 0.90                    | 0.2827  | 0.30     | 0.5643  | -0.33               | 0.6726  | -                       | -       |
| Bicarbonate | -0.41         | 0.1174  | -0.23    | 0.5195  | -0.38               | 0.4051  | -0.96                   | 0.1790  | -0.54    | 0.2894  | 0.63                | 0.3733  | -                       | -       |

(\*) Represents statistical significance (p-value < 0.05). (-) denotes comparisons not made due to the lack of points.

The Pearson correlation and corresponding p-value between  $\alpha$ -diversity (Shannon index) and the main physicochemical parameters are shown. EC: electrical conductivity; Ox diss: dissolved oxygen; Ca diss: dissolved calcium; Mg diss: dissolved magnesium; carbonate: alkalinity carbonate; bicarbonate: alkaline bicarbonate. Only 8 of the most constraining variables are shown in this table.

**Table S4.** Relative abundance of the first 31 genera in the La Brava and La Punta lake system.

| Genera                     | Relative abundance (%) |       |       |       |       |       |       |       |       |       |          |       |       |       |       |       |
|----------------------------|------------------------|-------|-------|-------|-------|-------|-------|-------|-------|-------|----------|-------|-------|-------|-------|-------|
|                            | La Brava               |       |       |       |       |       |       |       |       |       | La Punta |       |       |       |       |       |
|                            | B01                    | B02   | B03   | B04   | B05   | B06   | B07   | B08   | B09   | B10   | P01      | P02   | P03   | P04   | P05   | P06   |
| <i>Psychroflexus</i>       | 14.63                  | 51.05 | 60.65 | 8.10  | 64.90 | 57.04 | 54.39 | 0.83  | 0.31  | 56.61 | 0.10     | 0.19  | 0.08  | 0.02  | 0.49  | 1.04  |
| <i>Pseudospirillum</i>     | 1.95                   | 0.16  | 0.06  | 0.94  | 0.02  | 0.04  | 0.30  | 16.70 | 6.18  | 0.29  | 8.83     | 18.67 | 28.23 | 26.88 | 15.38 | 26.40 |
| <i>Roseovarius</i>         | 3.94                   | 2.84  | 4.15  | 2.24  | 3.53  | 3.54  | 3.47  | 6.11  | 6.01  | 2.94  | 21.92    | 36.34 | 17.86 | 2.65  | 8.56  | 15.87 |
| <i>Thiomicrospira</i>      | 2.54                   | 20.94 | 7.23  | 64.45 | 3.39  | 12.02 | 11.79 | 0.07  | 0.00  | 2.40  | 0.01     | 0.71  | 0.00  | 0.00  | 0.01  | 0.13  |
| <i>Pseudomonas</i>         | 36.81                  | 1.77  | 0.03  | 2.93  | 0.92  | 0.42  | 0.07  | 5.19  | 19.81 | 10.09 | 8.59     | 3.31  | 7.55  | 22.34 | 0.41  | 0.63  |
| <i>Pseudoalteromonas</i>   | 0.54                   | 0.06  | 0.01  | 0.27  | 0.09  | 0.06  | 0.01  | 13.03 | 11.87 | 0.43  | 4.95     | 0.25  | 1.65  | 0.24  | 19.19 | 7.44  |
| <i>Ruegeria</i>            | 0.69                   | 9.11  | 8.62  | 0.22  | 8.10  | 7.37  | 7.74  | 0.01  | 0.01  | 10.10 | 0.02     | 0.07  | 0.01  | 0.00  | 0.12  | 0.27  |
| <i>Rubritalea</i>          | 0.02                   | 0.01  | 0.00  | 0.33  | 0.03  | 0.00  | 0.00  | 12.69 | 20.80 | 0.11  | 0.01     | 0.02  | 4.83  | 5.42  | 0.36  | 4.95  |
| <i>DS001</i>               | 0.04                   | 2.02  | 5.65  | 0.01  | 6.42  | 6.07  | 6.89  | 0.10  | 0.12  | 0.01  | 0.48     | 0.50  | 0.48  | 0.45  | 4.68  | 7.20  |
| <i>Candidatus_Aquiluna</i> | 0.07                   | 0.21  | 0.50  | 0.00  | 0.57  | 0.55  | 0.53  | 0.81  | 0.54  | 0.48  | 2.69     | 3.42  | 10.50 | 12.54 | 0.71  | 0.85  |
| <i>Roseibaca</i>           | 1.80                   | 4.74  | 6.22  | 0.72  | 5.30  | 4.59  | 5.88  | 0.01  | 0.07  | 0.50  | 0.02     | 0.01  | 0.01  | 0.00  | 0.27  | 0.53  |
| <i>NS5_marine_group</i>    | 9.63                   | 0.00  | 0.00  | 0.00  | 0.00  | 0.00  | 0.00  | 1.04  | 4.09  | 2.31  | 10.95    | 0.03  | 0.00  | 0.01  | 0.01  | 0.00  |
| <i>Balneola</i>            | 0.01                   | 0.00  | 0.00  | 0.01  | 0.00  | 0.00  | 0.00  | 0.40  | 0.52  | 0.01  | 2.66     | 4.32  | 3.21  | 1.89  | 3.19  | 4.14  |
| <i>Marinomonas</i>         | 0.93                   | 0.02  | 0.00  | 0.00  | 0.00  | 0.01  | 0.00  | 1.44  | 2.87  | 0.77  | 5.56     | 0.09  | 0.86  | 0.03  | 6.90  | 0.54  |
| <i>Methylophaga</i>        | 0.76                   | 0.00  | 0.00  | 0.32  | 0.01  | 0.00  | 0.00  | 2.29  | 2.37  | 0.12  | 3.20     | 9.05  | 0.64  | 0.12  | 0.66  | 0.08  |
| <i>Alcanivorax</i>         | 0.02                   | 0.01  | 0.00  | 0.41  | 0.02  | 0.01  | 0.03  | 3.44  | 2.61  | 1.08  | 2.51     | 0.01  | 0.01  | 0.07  | 3.86  | 4.68  |
| <i>Perlucidibaca</i>       | 2.21                   | 0.00  | 0.00  | 0.00  | 0.00  | 0.00  | 0.00  | 2.72  | 0.81  | 0.17  | 0.54     | 1.39  | 1.24  | 7.02  | 0.00  | 0.00  |
| <i>Owenweeksia</i>         | 0.09                   | 1.14  | 0.62  | 1.20  | 0.22  | 0.61  | 0.85  | 2.13  | 2.24  | 0.54  | 1.01     | 0.64  | 0.68  | 1.99  | 0.55  | 0.81  |
| <i>Marinicella</i>         | 0.20                   | 0.05  | 0.03  | 0.56  | 0.03  | 0.01  | 0.01  | 0.01  | 0.19  | 0.19  | 0.13     | 0.06  | 0.01  | 0.01  | 8.31  | 5.36  |
| <i>Loktanella</i>          | 0.24                   | 0.12  | 0.44  | 0.07  | 0.40  | 0.48  | 0.51  | 1.62  | 0.55  | 1.55  | 1.42     | 2.39  | 1.96  | 2.82  | 0.16  | 0.02  |
| <i>Marivita</i>            | 0.07                   | 0.34  | 1.81  | 0.15  | 1.85  | 2.11  | 2.43  | 0.03  | 0.11  | 0.05  | 0.05     | 0.55  | 0.14  | 0.11  | 3.27  | 1.27  |
| <i>Hyphomonas</i>          | 3.85                   | 0.20  | 0.06  | 0.07  | 0.07  | 0.04  | 0.05  | 2.97  | 1.48  | 0.84  | 1.04     | 1.11  | 0.88  | 1.26  | 0.15  | 0.22  |
| <i>Arthrobacter</i>        | 0.30                   | 0.49  | 0.96  | 0.00  | 1.15  | 1.11  | 0.86  | 0.53  | 0.23  | 1.80  | 1.09     | 1.37  | 0.52  | 0.30  | 1.38  | 1.39  |
| <i>Kiloniella</i>          | 0.14                   | 0.00  | 0.00  | 0.01  | 0.01  | 0.00  | 0.00  | 8.27  | 3.23  | 0.01  | 0.01     | 0.08  | 0.94  | 0.03  | 0.02  | 0.00  |
| <i>Fabibacter</i>          | 0.04                   | 0.02  | 0.01  | 0.55  | 0.01  | 0.02  | 0.05  | 1.16  | 2.10  | 0.25  | 1.05     | 0.67  | 1.29  | 0.68  | 2.93  | 1.32  |
| <i>Others</i>              | 18.49                  | 4.71  | 2.94  | 16.44 | 2.95  | 3.87  | 4.15  | 16.42 | 10.87 | 6.34  | 21.15    | 14.74 | 16.39 | 13.13 | 18.44 | 14.85 |

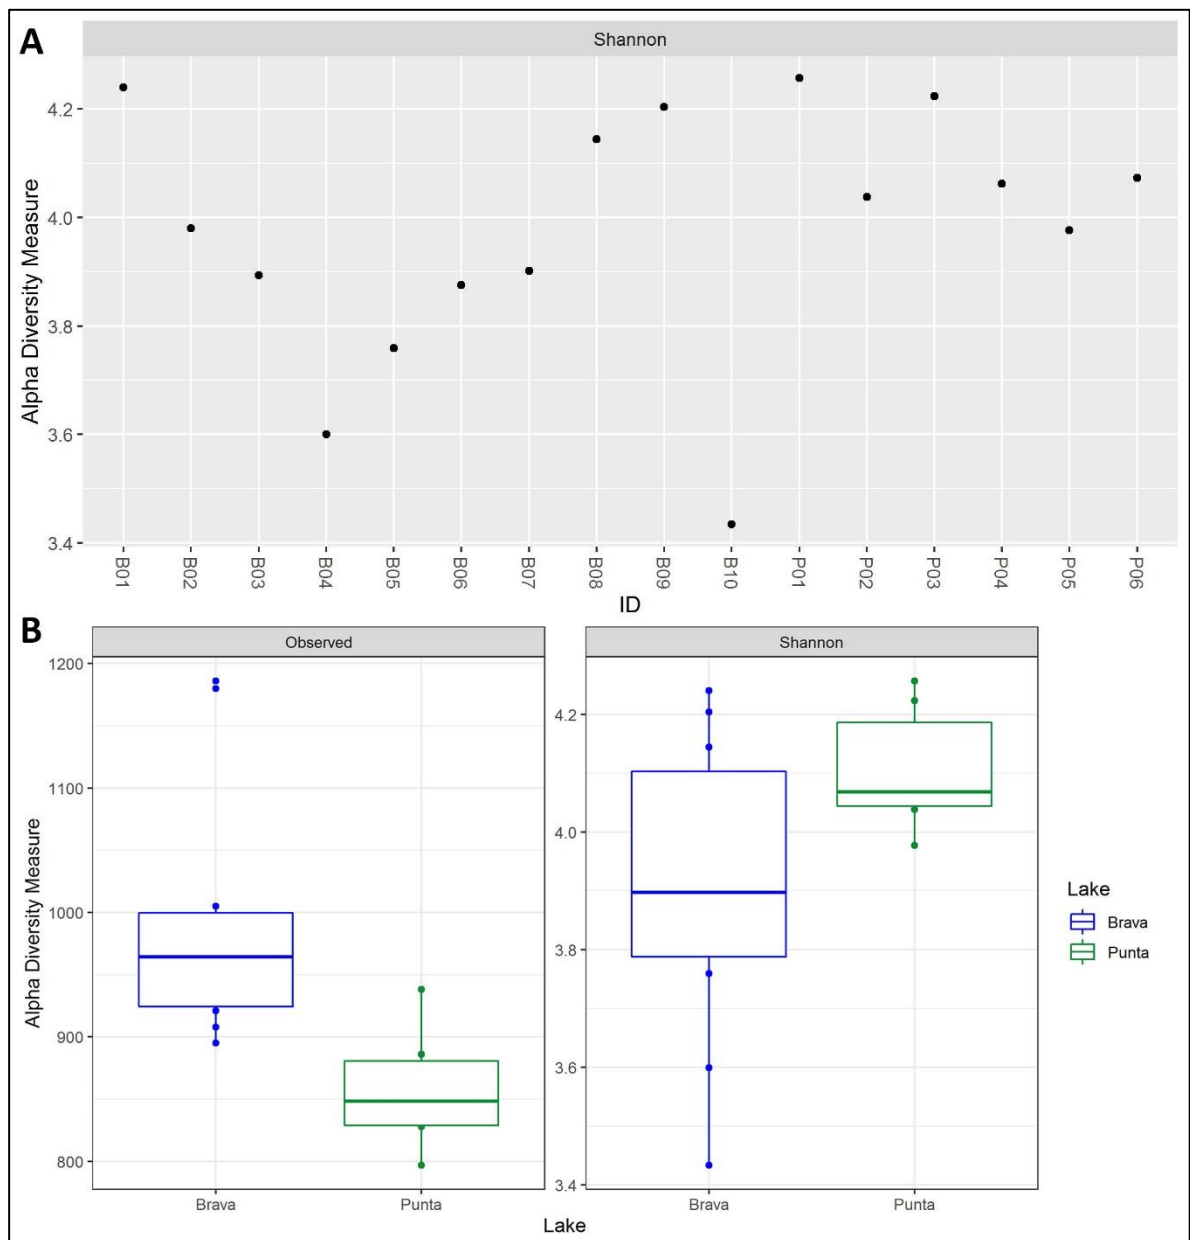

**Figure S1.** The  $\alpha$ -diversity of microorganisms present in the water columns of the La Brava and La Punta lake system.

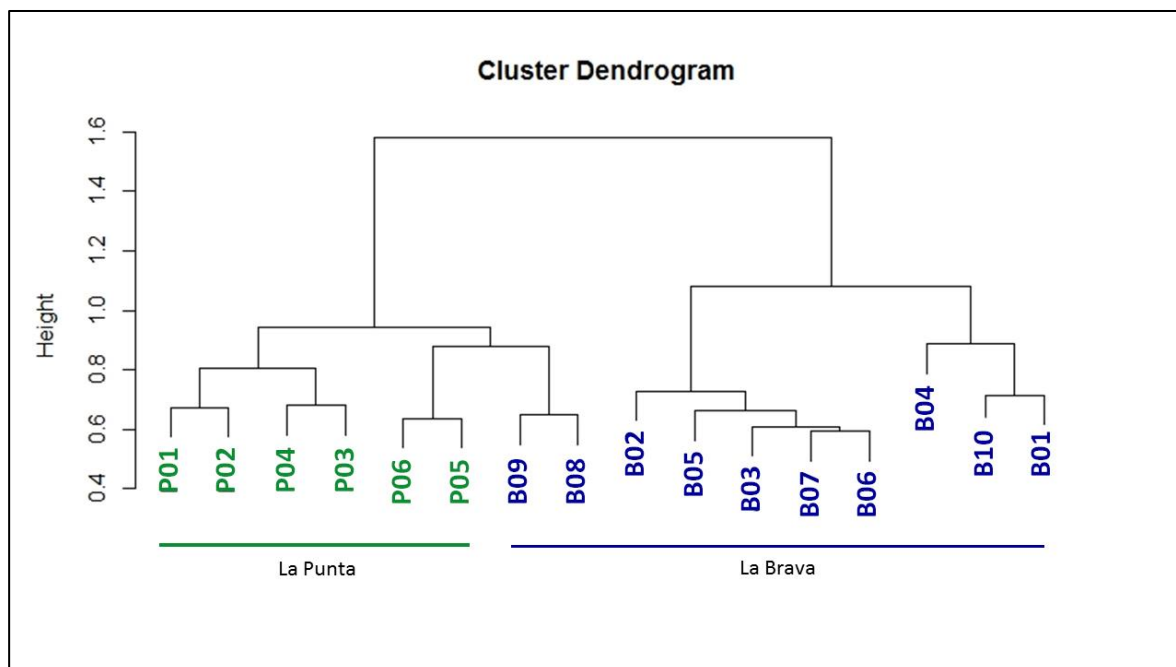

**Figure S2.** Cluster analysis of the different sampling points of the La Brava–La Punta lake system using the Ward method, based on dissimilarities of  $\beta$ -diversity.
